# Supplementary material for: Novel triple-shape PCU/PPDO interpenetrating polymer networks constructed by self-complementary quadruple hydrogen bonding and covalent bonding
Source: Royal Society of Chemistry journal article supplement (doi:10.1039/c3py01476b), 2013-11-19
Supplement: c3py01476b.pdf [file c3py01476b.pdf]

## Supporting Information

for *Polymer Chemistry*, DOI: 10.1039/c3py01476b

### A Novel Triple-shape PCU/PPDO Interpenetrating Polymer Networks Constructed by Self-Complementary Quadruple Hydrogen Bonding and Covalent Bonding

Liping Xiao, Min Wei, Miqin Zhan, Jingjing Zhang, Hui Xie, Xinyuan Deng, Keke Yang\* and Yuzhong Wang\*

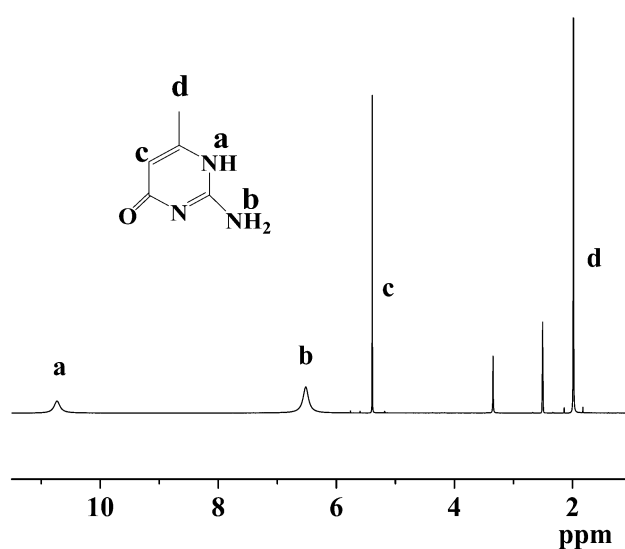

**Fig. S1** The <sup>1</sup>H NMR spectrum of 2-amino-4-hydroxy-6-methylpyrimidine (MIC).

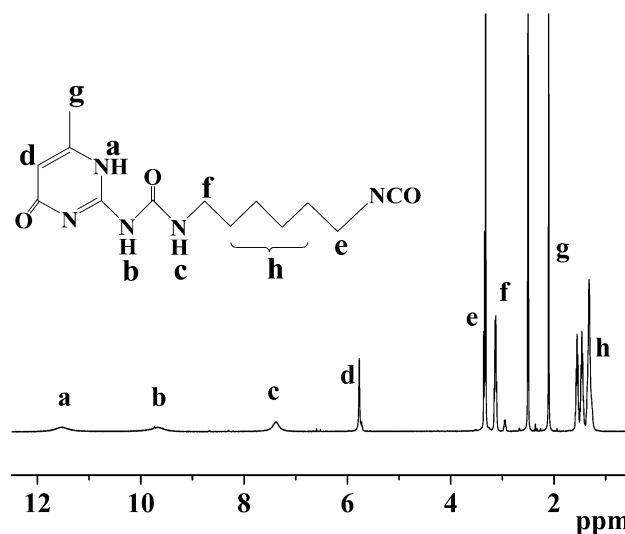

**Fig. S2** The <sup>1</sup>H NMR spectrum of 2-ureido-4-pyrididone (UPy).

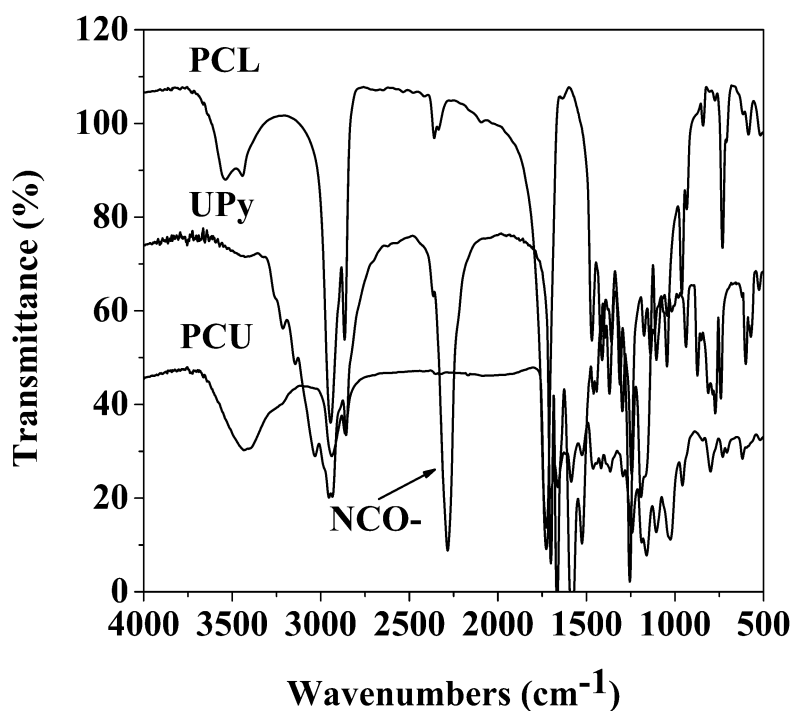

Fig. S3 The spectrum of 2-ureido-4-pyrididone (UPy), <sup>4</sup>PCL and PCU.

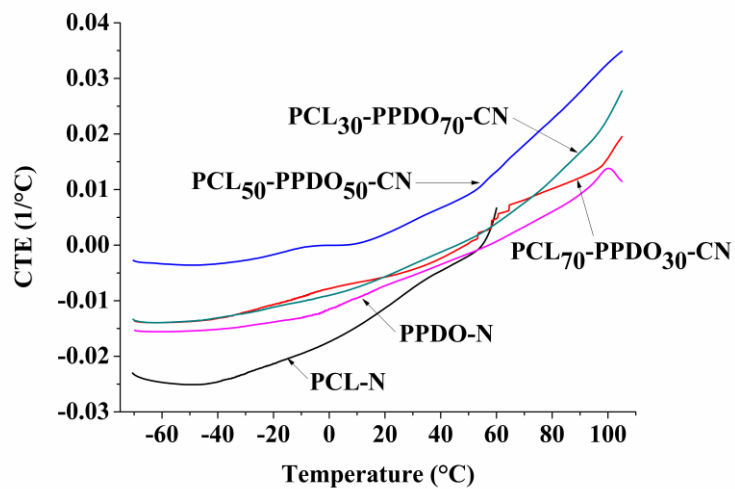

Fig. S4 Temperature dependence of CTE of PCL-N, PPDO-N and PCL-PPDO-CN.

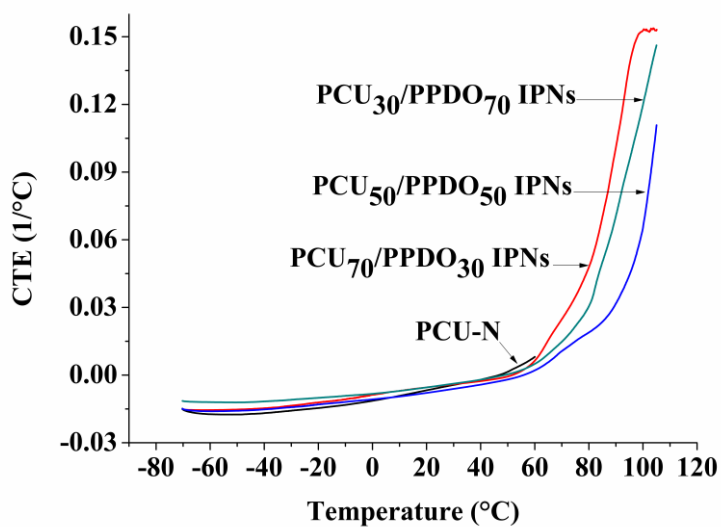

Fig. S5 Temperature dependence of CTE of PCU-N and PCU/PPDO IPNs.

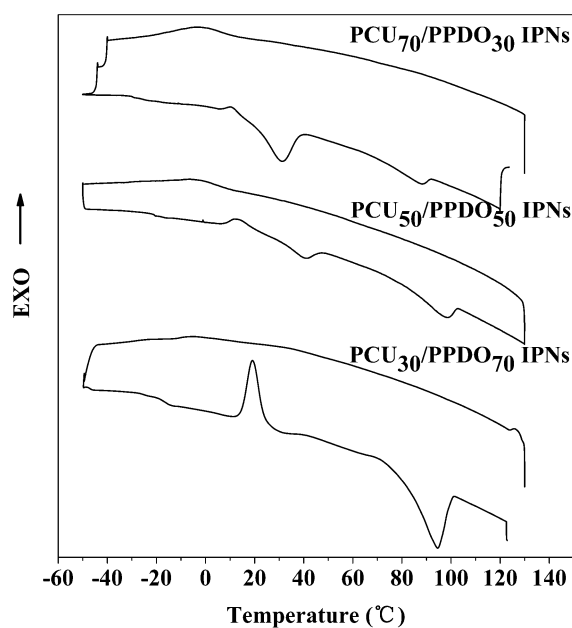

Fig. S6 DSC curves for IPNs at different heating rate: the up for PCU<sub>70</sub>/PPDO<sub>30</sub> IPNs at 2 °C min<sup>-1</sup>, the middle for PCU<sub>50</sub>/PPDO<sub>50</sub> IPNs at 1 °C min<sup>-1</sup> and the below for PCU<sub>30</sub>/PPDO<sub>70</sub> IPNs at 2 °C min<sup>-1</sup> in Temperature-modulated mode.

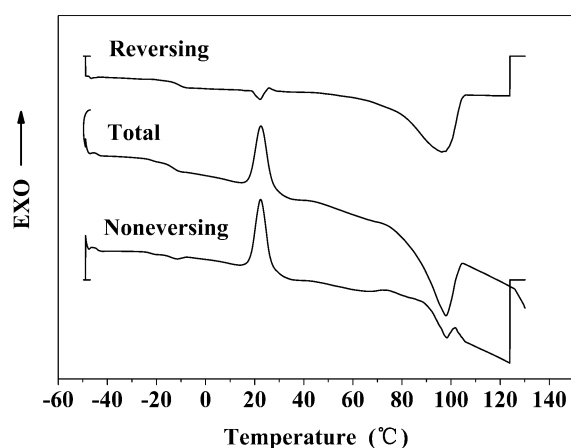

**Fig. S7** TMDSC traces of PCU<sub>30</sub>/PPDO<sub>70</sub> IPNs nonisothermally crystallized from the amorphous state at 2 °C min<sup>-1</sup>. Reversing heat flow (Reversing), Nonreversing heat flow (Nonreversing), Total heat flow (Total).

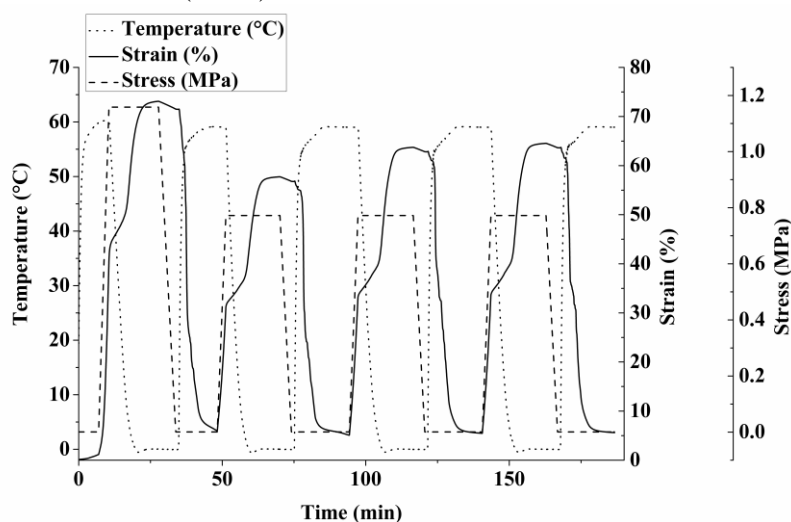

**Fig. S8** The dual-shape memory effect behavior of PCL-N.

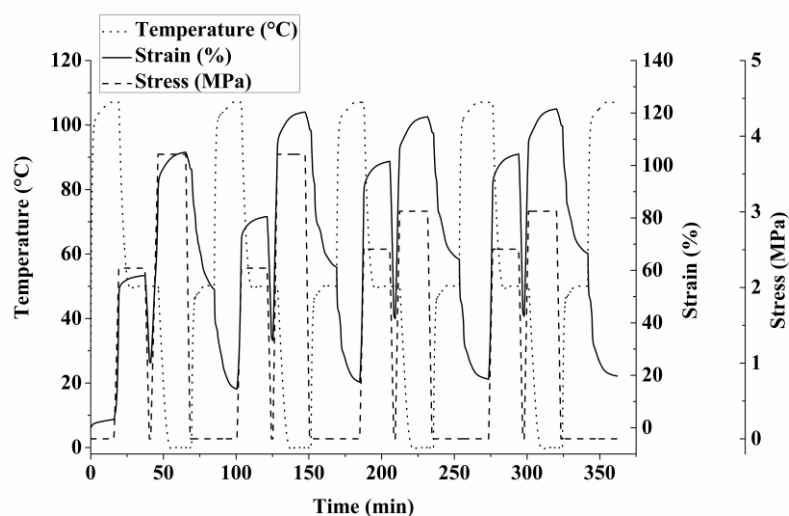

**Fig. S9** The triple-shape memory effect behavior of PCL<sub>70</sub>-PPDO<sub>30</sub>-CN.

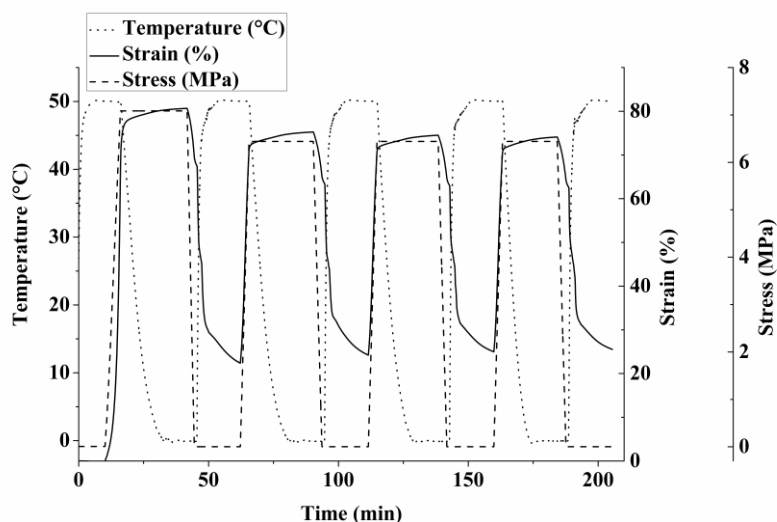

Fig. S10 The dual-shape memory effect behavior of PCL<sub>50</sub>-PPDO<sub>50</sub>-CN.

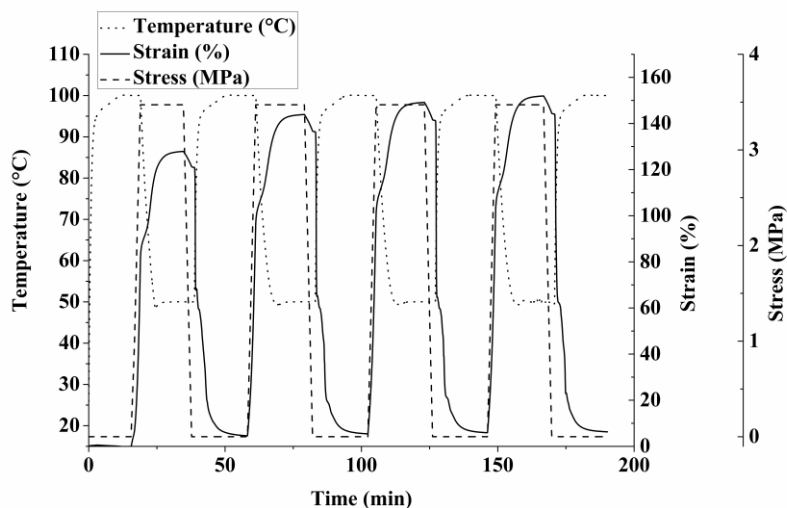

Fig. S11 The dual-shape memory effect behavior of PPDO-N.

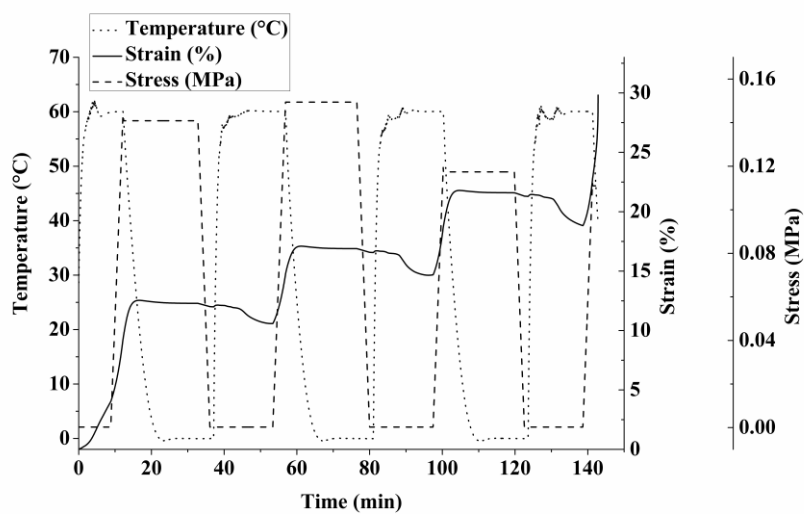

Fig. S12 The dual-shape memory effect behavior of PCU-N.

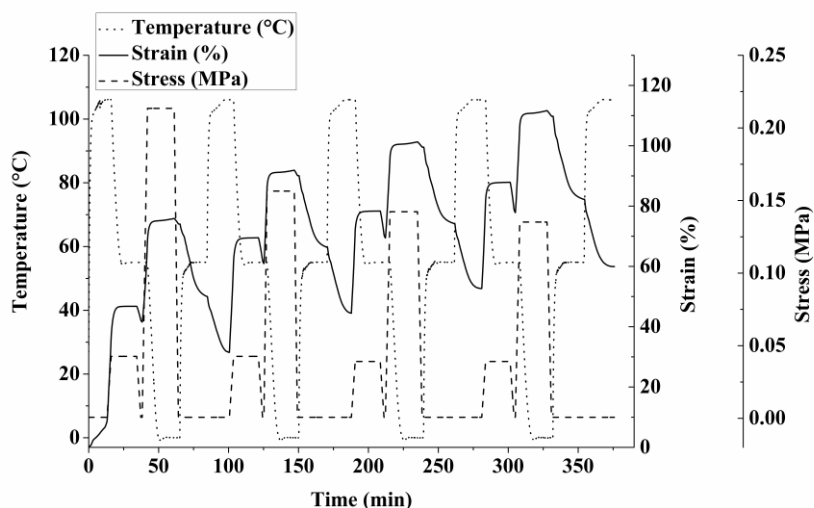

**Fig. S13** The triple-shape memory effect behavior of PCU<sub>70</sub>/PPDO<sub>30</sub> IPNs.

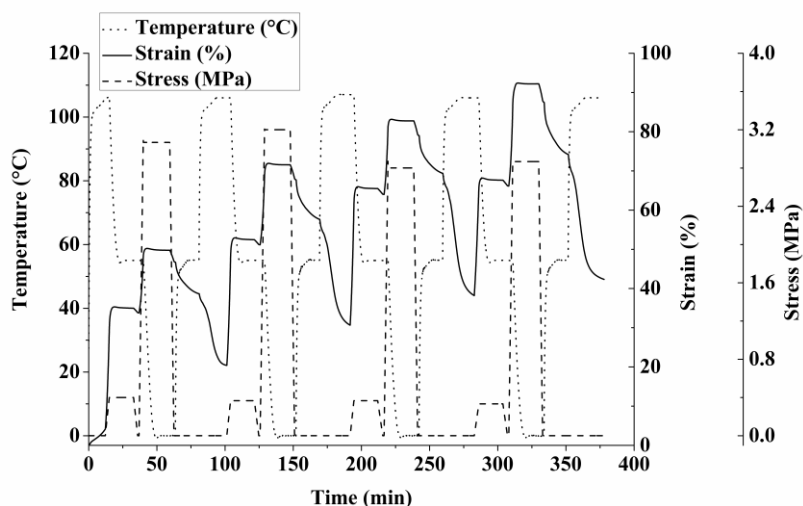

**Fig. S14** The triple-shape memory effect behavior of PCU<sub>50</sub>/PPDO<sub>50</sub> IPNs.

**Table S1** Data of various composition of PCU/PPDO IPNs from DSC and TMDSC analysis.

| Sample name                                | 1 <sup>st</sup> cooling scan |                                        |                  |                                        | Subsequent heating scan |                                           |                  |                                        |                  |                                        |
|--------------------------------------------|------------------------------|----------------------------------------|------------------|----------------------------------------|-------------------------|-------------------------------------------|------------------|----------------------------------------|------------------|----------------------------------------|
|                                            | $T_c^a$<br>(° C)             | $\Delta H_c^a$<br>(J g <sup>-1</sup> ) | $T_c^b$<br>(° C) | $\Delta H_c^b$<br>(J g <sup>-1</sup> ) | $T_{cc}^b$<br>(° C)     | $\Delta H_{cc}^b$<br>(J g <sup>-1</sup> ) | $T_m^a$<br>(° C) | $\Delta H_m^a$<br>(J g <sup>-1</sup> ) | $T_m^b$<br>(° C) | $\Delta H_m^b$<br>(J g <sup>-1</sup> ) |
| PCU <sub>70</sub> /PPDO <sub>30</sub> IPNs | -13.6                        | 11.6                                   | --               | --                                     | --                      | --                                        | 41.1             | 15.7                                   | 97.8             | 3.9                                    |
| PCU <sub>50</sub> /PPDO <sub>50</sub> IPNs | -2.0                         | 7.4                                    | --               | --                                     | 13.5                    | 8.2                                       | 40.4             | 10.1                                   | 97.4             | 16.2                                   |
| PCU <sub>30</sub> /PPDO <sub>70</sub> IPNs | --                           | --                                     | --               | --                                     | 22.4                    | 22.4                                      | 22.3             | 2.1                                    | 97.9             | 9.2                                    |

<sup>a</sup> is PCU segment, <sup>b</sup> is PPDO segment. For PCU<sub>30</sub>/PPDO<sub>70</sub> IPNs,  $T_{cc}^b$  is obtained from the Nonreversing heat flow,  $T_m^a$  and  $T_m^b$  are obtained from the Rversing heat flow.
